# Supplementary material
Source: PubMed Central journal article supplement (PMC7443510)
Supplement: supp_RA120.014555_161122_2_supp_554176_qcfccc.pdf [file supp_RA120.014555_161122_2_supp_554176_qcfccc.pdf]

**PelX is a UDP-N-acetylglucosamine C4-epimerase involved in Pel polysaccharide-dependent biofilm formation**

Lindsey S. Marmont<sup>a, b, 1, \*</sup>, Gregory B. Whitfield<sup>a, b, 2, \*</sup>, Roland Pfoh<sup>a, b</sup>, Rohan J. Williams<sup>c</sup>, Trevor E. Randall<sup>d</sup>, Alexandra Ostaszewski<sup>d</sup>, Erum Razvi<sup>a, b</sup>, Ryan A. Groves<sup>d</sup>, Howard Robinson<sup>e</sup>, Mark Nitz<sup>c</sup>, Matthew R. Parsek<sup>f</sup>, Ian A. Lewis<sup>d</sup>, John C. Whitney<sup>a, b, 3</sup>, Joe J. Harrison<sup>d</sup>, and P. Lynne Howell<sup>a, b, #</sup>

<sup>a</sup>Program in Molecular Medicine, The Hospital for Sick Children, Toronto, ON, Canada

<sup>b</sup>Department of Biochemistry, University of Toronto, Toronto, ON, Canada

<sup>c</sup>Department of Chemistry, University of Toronto, Toronto, ON, Canada

<sup>d</sup>Department of Biological Sciences, University of Calgary, Calgary, AB, Canada

<sup>e</sup>Photon Science Division, Brookhaven National Laboratory, Upton, NY, USA

<sup>f</sup>Department of Microbiology, University of Washington, Seattle, WA, USA

<sup>1</sup>Current address: Department of Microbiology, Harvard Medical School, Boston, MA, USA

<sup>2</sup>Current address: Département de microbiologie, Infectiologie et Immunologie, Université de Montréal, Montréal, Quebec, Canada.

<sup>3</sup>Current address: Department of Biochemistry and Biomedical Sciences, McMaster University, Hamilton, ON, Canada

\*These authors contributed equally to this work

Running title: *Pel* biosynthesis requires a UDP-GlcNAc C4-epimerase

#Address correspondence to: P. Lynne Howell, howell@sickkids.ca

**Keywords:** polysaccharide, biofilm, *Pseudomonas protegens*, X-ray crystallography, epimerase

**Table S1: Bacterial strains and plasmids used in this study**

| Strain/Plasmid/Primer                                                 | Genotype/Properties                                                                                                                                                                                                                                                           | Source     |
|-----------------------------------------------------------------------|-------------------------------------------------------------------------------------------------------------------------------------------------------------------------------------------------------------------------------------------------------------------------------|------------|
| <b><i>E. coli</i></b>                                                 |                                                                                                                                                                                                                                                                               |            |
| TOP10                                                                 | F <sup>-</sup> <i>mcrA</i> Δ( <i>mrr-hsdRMS-mcrBC</i> ) Φ80 <i>lacZ</i> ΔM15 Δ <i>lacX74</i> <i>recA1</i> <i>araD139</i> Δ( <i>ara leu</i> ) 7697 <i>galU galK rpsL endA1 nupG</i> , Str <sup>R</sup>                                                                         | Invitrogen |
| BL21CodonPlus™ (DE3)-RP                                               | F <sup>-</sup> <i>ompT hsdS</i> (rB <sup>-</sup> mB <sup>-</sup> ) <i>dcm</i> <sup>+</sup> Tet <sup>r</sup> <i>gal</i> λ (DE3) <i>endA</i> Hte <i>metA</i> ::Tn5(Kan <sup>r</sup> ) [ <i>argU ileY leuW Cam</i> <sup>r</sup> ]                                                | Stratagene |
| DH5α                                                                  | F <sup>-</sup> Φ80 <i>lacZ</i> ΔM15 Δ( <i>lacZYA-argF</i> ) U169 <i>recA1</i> <i>endA1 hsdR17</i> (rK <sup>-</sup> , mK <sup>+</sup> ) <i>phoA supE44</i> λ- <i>thi-1 gyrA96 relA1</i>                                                                                        | Invitrogen |
| SM10                                                                  | <i>thi thr leu tonA lacY supE recA::RP4-2-Tc::Mu Km λpir</i> , Kan <sup>R</sup> , Tet <sup>R</sup>                                                                                                                                                                            | 1          |
| <b><i>P. protegens</i></b>                                            |                                                                                                                                                                                                                                                                               |            |
| Pf-5                                                                  | Wild-type                                                                                                                                                                                                                                                                     |            |
| Pf-5 Δ <i>pslA</i>                                                    | In frame deletion of <i>pslA</i> (PFL_4208)                                                                                                                                                                                                                                   | This study |
| Pf-5 Δ <i>pelF</i>                                                    | In frame deletion of <i>pelF</i> (PFL_2977)                                                                                                                                                                                                                                   | This study |
| Pf-5 Δ <i>pslA</i> Δ <i>pelF</i>                                      | In frame deletion of <i>pslA</i> and <i>pelF</i>                                                                                                                                                                                                                              | This study |
| Pf-5 Δ <i>pelX</i>                                                    | In frame deletion of <i>pelX</i> (PFL_2971)                                                                                                                                                                                                                                   | This study |
| Pf-5 ΔPFL_5533                                                        | In frame deletion of PFL_5533                                                                                                                                                                                                                                                 | This study |
| Pf-5 Δ <i>pelX</i> ΔPFL_5533                                          | In frame deletion of <i>pelX</i> and PFL_5533                                                                                                                                                                                                                                 | This study |
| Pf-5 <i>pelX-V</i>                                                    | <i>pelX</i> with a C-terminal VSV-G (YTDIEMNRLGK) tag                                                                                                                                                                                                                         | This study |
| Pf-5 <i>pelF-V</i>                                                    | <i>pelF</i> with a C-terminal VSV-G (YTDIEMNRLGK) tag                                                                                                                                                                                                                         | This study |
| Pf-5 PFL_5533- <i>V</i>                                               | PFL_5533 with a C-terminal VSV-G (YTDIEMNRLGK) tag                                                                                                                                                                                                                            | This study |
| <b>Plasmids</b>                                                       |                                                                                                                                                                                                                                                                               |            |
| <b>Protein production</b>                                             |                                                                                                                                                                                                                                                                               |            |
| pET-28a(+)                                                            | IPTG inducible expression vector; Kan <sup>r</sup>                                                                                                                                                                                                                            | Novagen    |
| pLSM-PelX <sub>Pp</sub> <sup>1-309</sup> <sub>C232S</sub>             | PelX <sub>Pp</sub> encoding the full-length protein. Expressed thrombin-cleavable fusion protein MGSSH <sub>6</sub> SSGLVPRGSHM-PelX <sub>Pp</sub> <sup>1-309</sup> in pET-28a. Mutation of cysteine 232 to serine.                                                           | This study |
| pLSM-PelX <sub>Pp</sub> <sup>1-309</sup> <sub>C232S/Y146F/S121A</sub> | PelX <sub>Pp</sub> encoding the full-length protein. Expressed thrombin-cleavable fusion protein MGSSH <sub>6</sub> SSGLVPRGSHM-PelX <sub>Pp</sub> <sup>1-309</sup> in pET-28a. Mutation of cysteine 232 to serine, tyrosine 146 to phenylalanine, and serine 121 to alanine. | This study |
| <b>WspR overexpression</b>                                            |                                                                                                                                                                                                                                                                               |            |
| pPSV39                                                                | Expression vector with <i>lacI</i> , lacUV5 promoter derived from pPSV35                                                                                                                                                                                                      | 2          |
| pLSM21                                                                | WspR <sup>R242A</sup> from PAO1 encoding the full-length protein with a mutation to the allosteric inhibition site in pPSV39. IPTG inducible expression.                                                                                                                      | This study |
| <b>Two Step Allelic exchange</b>                                      |                                                                                                                                                                                                                                                                               |            |
| pEXG2                                                                 | allelic exchange vector, Gen <sup>R</sup>                                                                                                                                                                                                                                     | 2          |
| pLSM33                                                                | pEXG2 with an in-frame deletion allele for <i>P. protegens</i> Pf-5 <i>pslA</i> (PFL 4208) Gen <sup>R</sup>                                                                                                                                                                   | This study |
| pLSM34                                                                | pEXG2 with an in-frame deletion allele for <i>P. protegens</i> Pf-5 <i>pelF</i> (PFL 2977) Gen <sup>R</sup>                                                                                                                                                                   | This study |
| pLSM35                                                                | pEXG2 with an in-frame deletion allele for <i>P. protegens</i> Pf-5 <i>pelX</i> (PFL_2971) Gen <sup>R</sup>                                                                                                                                                                   | This study |
| pLSM36                                                                | pEXG2 with an in-frame deletion allele for <i>P. protegens</i> Pf-5 PFL_5533 Gen <sup>R</sup>                                                                                                                                                                                 | This study |

*Pel* biosynthesis requires a UDP-GlcNAc C4-epimerase

|        |                                                                                     |            |
|--------|-------------------------------------------------------------------------------------|------------|
| pLSM37 | pEXG2 with full-length <i>pelF</i> fused to a C-terminal VSV-G tag Gen <sup>R</sup> | This study |
| pLSM38 | pEXG2 with full-length <i>pelX</i> fused to a C-terminal VSV-G tag Gen <sup>R</sup> | This study |
| pLSM39 | pEXG2 with full-length PFL_5533 fused to a C-terminal VSV-G tag Gen <sup>R</sup>    | This study |

Amp, ampicillin; Cam, chloramphenicol; Kan, kanamycin; Gen, Gentamicin; Str, streptomycin; Tet, tetracycline

**Table S2: Primers used in this study**

| Primers                                           | Sequence*                                                          |
|---------------------------------------------------|--------------------------------------------------------------------|
| <b>Vectors for recombinant protein production</b> |                                                                    |
| PelX 1F                                           | GG <b>CAT ATG</b> TCT GCC GAA CGG ATA CTG                          |
| PelX 309R                                         | GG <b>CTC GAG</b> CTA <u>AAG GCT GCG GTA AAG CCG</u>               |
| PelX C232S F                                      | <u>CAG GGC CTG GAA aGC CCC GCG CCG G</u>                           |
| PelX C232S R                                      | <u>C CGG CGC GGG GcT TTC CAG GCC CTG</u>                           |
| PelX Y146F F                                      | <u>CC CTC ACG CCC TtC GCG GCG GAC AA</u>                           |
| PelX Y146F R                                      | <u>TT GTC CGC CGC GaA GGG CGT GAG GG</u>                           |
| PelX S121A F                                      | <u>G GTG TTC GCG TCC gcT GCG GCG GTC TAT GG</u>                    |
| PelX S121A R                                      | <u>CC ATA GAC CGC CGC Agc GGA CGC GAA CAC C</u>                    |
| <b>Allelic exchange vectors</b>                   |                                                                    |
| PslA_Pf5_upF                                      | TAG TAC AGA <b>GAA TTC</b> <u>GGC AAT CAG CCG GGT ATG G</u>        |
| PslA_Pf5_upR                                      | <u>G TGT GCT CAT TCA GAA GGC CTC GCT GTC TAC AGG TTG CAA CCG</u>   |
| PslA_Pf5_downF                                    | <u>GAG GCC TTC TGA ATG AGC ACA C</u>                               |
| PslA_Pf5_downR                                    | T CAA TCA GTA <b>TCT AGA</b> <u>GCA TGC AGA ACA TCC CGC CG</u>     |
| PelF_Pf5_upF                                      | TAG TAC AGA <b>GAA TTC</b> <u>CAA CTG CAT TCG CCC ACC TTC</u>      |
| PelF_Pf5_upR                                      | <u>CAC AGC CTC CTT GTG TGG GGT GGG GGT TGA GTC GGG GGT</u>         |
| PelF_Pf5_downF                                    | <u>ACC CCA CAC AAG GAG GCT GTG</u>                                 |
| PelF_Pf5_downR                                    | T CAA TCA GTA <b>TCT AGA</b> <u>CAG CGC CAG CAA CAG CCCT</u>       |
| PelX_Pf5_upF                                      | TAG TAC AGA <b>GGT ACC</b> GGA ACA ACG CATAGG GAA TCGC             |
| PelX_Pf5_upR                                      | <u>GCT GCG GTA AAG CCG TTC CAG AAC CAG TAT CCG TTC GGC AGA CAT</u> |
| PelX_Pf5_downF                                    | <u>CTG GAA CGG CTT TAC CGC AGC</u>                                 |

*Pel biosynthesis requires a UDP-GlcNAc C4-epimerase*

|                           |                                                                                             |
|---------------------------|---------------------------------------------------------------------------------------------|
| PelX_Pf5_downR            | T CAA TCA GTA <b>AAG CTT</b> <u>TCG GGG AGC AAC TGG AAA CTG</u>                             |
| PFL_5533 upF              | GTG <b>GAA TTC</b> <u>GCT TAC TAC TTC GAC TGG TTT C</u>                                     |
| PFL_5533 upR              | <u>GGC GAG GCC GAC GCT CAT</u> <u>CAA TAC GAG GCC TTC AGC CAT</u>                           |
| PFL_5533 downF            | <u>ATG AGC GTC GGC CTC GCC</u>                                                              |
| PFL_5533 downR            | GGT <b>AAG CTT</b> <u>CAA CGC CCA CGA AGC TGG T</u>                                         |
| PelX VSVG upF             | GGG <b>GAA TTC</b> <u>ATG GCA ATA ACG GCG AGG GC</u>                                        |
| PelX VSVG upR             | ttt tcc taa tct att cat ttc aat atc tgt ata <u>AAG GCT GCG GTA</u><br><u>AAG CCG TTC</u>    |
| PelX VSVG downF           | tat aca gat att gaa atg aat aga tta gga aaa <u>TAG TTC GTT GCC</u><br><u>TTA GGG GCG</u>    |
| PelX VSVG downR           | GGT <b>AAG CTT</b> <u>CTG GTC CTG CAG CGC CTT G</u>                                         |
| PelF VSVG upF             | GGG <b>GAA TTC</b> <u>GGT GGT GCC GAT CAA GGA CG</u>                                        |
| PelF VSVG upR             | ttt tcc taa tct att cat ttc aat atc tgt ata <u>CAC AGC CTC CTT</u><br><u>GTG TGG GG</u>     |
| PelF VSVG downF           | tat aca gat att gaa atg aat aga tta gga aaa <u>TAA ATG GCC GGC</u><br><u>ATC GGT TTC G</u>  |
| PelF VSVG downR           | GGG <b>AAG CTT</b> <u>ATC ACC AGG AGG ATG CGG TTA TA</u>                                    |
| PFL_5533 VSVG upF         | GGG <b>GAA TTC</b> <u>ATG GCA ACA ACG GGG AAG GC</u>                                        |
| PFL_5533 VSVG upR         | ttt tcc taa tct att cat ttc aat atc tgt ata <u>GCG CCC CAT CAG</u><br><u>GCG GG</u>         |
| PFL_5533 VSVG downF       | Tat aca gat att gaa atg aat aga tta gga aaa <u>TGA GGG AAA ACA</u><br><u>CGC ACA TGA AA</u> |
| PFL_5533 VSVG downR       | GAG <b>AAG CTT</b> <u>ACC CCG TTC GAA CAC GAC GT</u>                                        |
| <b>Sequencing Primers</b> |                                                                                             |
| PslA_Pf5_seqF             | <u>GGC TGG CCG GGG CGT C</u>                                                                |
| PslA_Pf5_seqR             | <u>GGT GGC TCT GCT CCA GGC A</u>                                                            |
| PelF_Pf5_seqF             | <u>GCG AGG CGC AGA CGT GGC</u>                                                              |
| PelF_Pf5_seqR             | <u>CAC CAG CTT CTC GGC CCG</u>                                                              |
| PelX_Pf5_seqF             | <u>TGC AGC AAG GAG GTG CGG G</u>                                                            |
| PelX_Pf5_seqR             | <u>GGC GAC GCC ATC GAG CTC</u>                                                              |
| PFL_5533 seqF             | <u>AAC TGC TCG ACG ACA CCC</u>                                                              |

*Pel biosynthesis requires a UDP-GlcNAc C4-epimerase*

|                            |                                                                      |
|----------------------------|----------------------------------------------------------------------|
| PFL_5533 seqR              | <u>GCA CGA ACG ATG ATG TCA C</u>                                     |
| <b>WspR overexpression</b> |                                                                      |
| WspR-F                     | GC <b>GAA TTC</b> <u>AGG AGG ATA TTC ATG CAC AAC CCT CAT GAG AGC</u> |
| WspR-R                     | GC <b>AAG CTT</b> <u>TCA GCC CGC CGG GGC</u>                         |

\*Restriction site sequences are in **bold**; regions of complementary to the target amplicon are underlined; lower case letters denote a nucleotide substitution or mismatch to sequence (in the case of VSV-G tag); regions of complementarity to facilitate splicing of PCR products are in *italics*

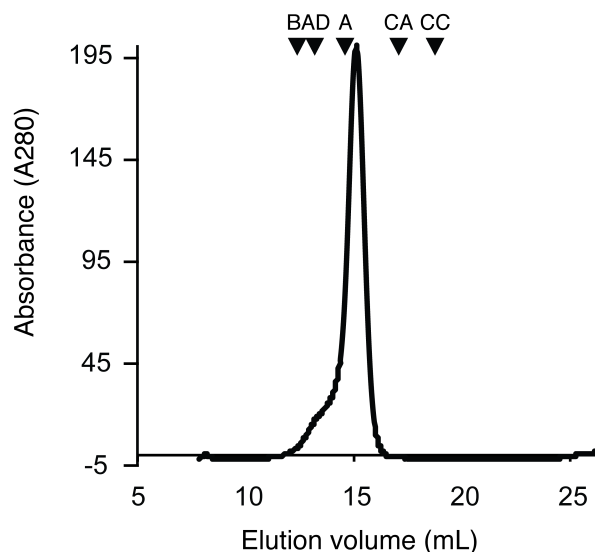

**Figure S1: PelX<sup>C232S</sup> forms a dimer in solution.** Analytical gel filtration demonstrates that PelX<sup>C232S</sup> exists as a dimer in solution, eluting at a molecular weight of approximately 63 kDa. Expected molecular weight: 34.6 kDa. Protein standards used to calibrate the column are indicated by inverted triangles; BA,  $\beta$ -amylase; AD, alcohol dehydrogenase; A, albumin; CA, carbonic anhydrase; CC, cytochrome C. The molecular weights of  $\beta$ -amylase, alcohol dehydrogenase, albumin, carbonic anhydrase, and cytochrome C are 200 kDa, 150 kDa, 66 kDa, 29 kDa, and 12.4 kDa, respectively.

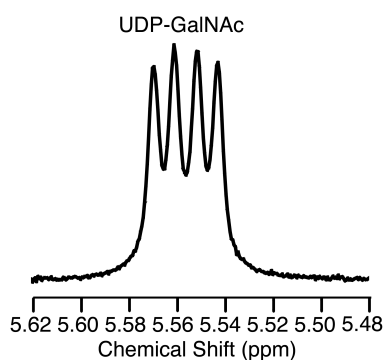

**Figure S2: PelX<sup>C232S/Y146F/S121A</sup> is catalytically inactive towards UDP-GalNAc.** <sup>1</sup>H NMR spectrum from the reaction of PelX<sup>C232S/S121A/Y146F</sup> with UDP-GalNAc.

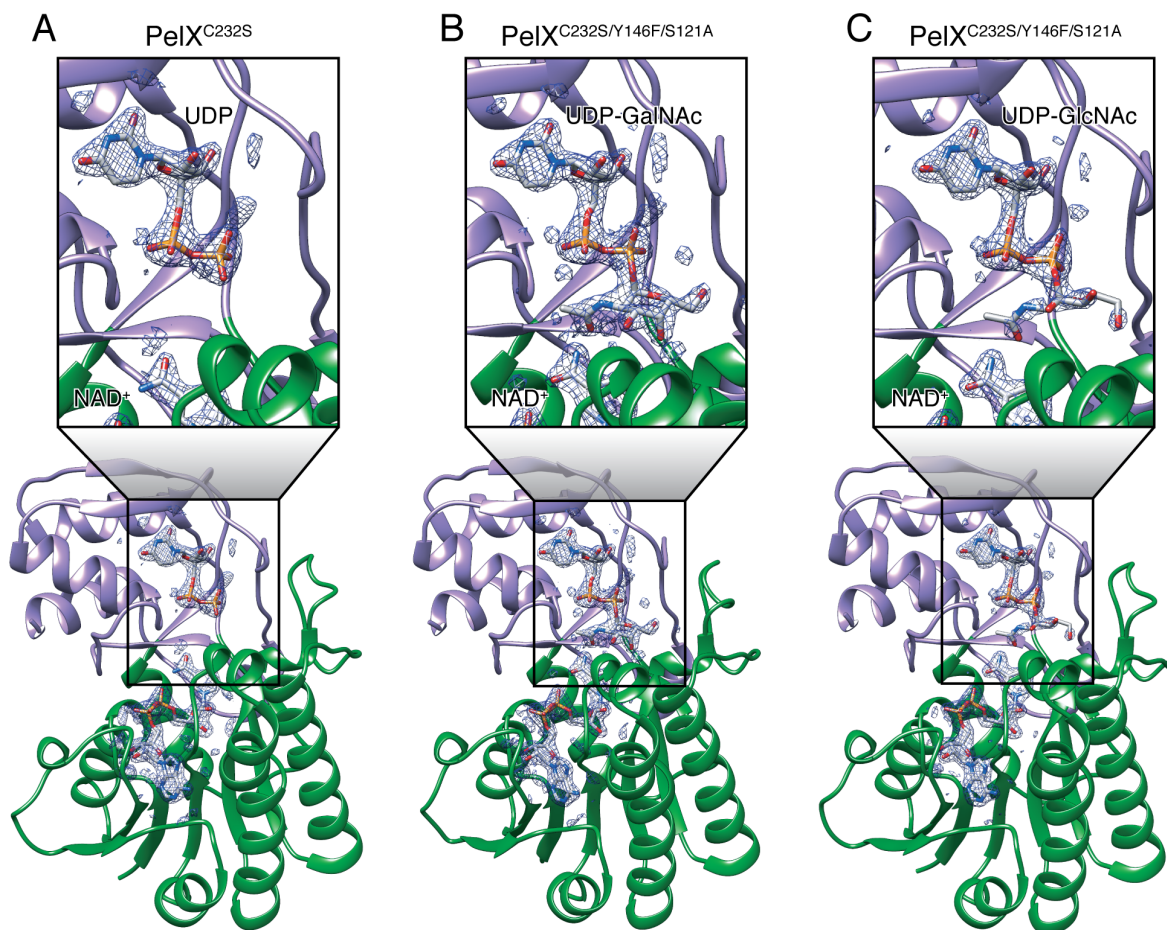

**Figure S3: PeIX<sup>C232S/Y146F/S121A</sup> density of the ligands.** PeIX is displayed with its N-terminal Rossmann-fold domain shown in green, and its C-terminal substrate-binding  $\alpha/\beta$ -domain in purple as in Figure 5. (A) PeIX<sup>C232S</sup> with density shown for UDP and NAD<sup>+</sup> (B) PeIX<sup>C232S/Y146F/S121A</sup> in complex with UDP-GalNAc and NAD<sup>+</sup> and (C) PeIX<sup>C232S/Y146F/S121A</sup> in complex with UDP-GlcNAc and NAD<sup>+</sup>. All three structures were modeled with NAD<sup>+</sup> and nucleotide or sugar-nucleotide shown in stick representation, with the corresponding  $|2mF_o-DFc|$  map displayed as black mesh contoured at  $2.0 \sigma$ .

## References

1. Hoang, T. T., Karkhoff-Schweizer, R. R., Kutchma, A. J. & Schweizer, H. P. A broad-host-range Flp-FRT recombination system for site-specific excision of chromosomally-located DNA sequences: application for isolation of unmarked *Pseudomonas aeruginosa* mutants. *Gene* **212**, 77–86 (1998).
2. Rietsch, A., Vallet-Gely, I., Dove, S. L. & Mekalanos, J. J. ExsE, a secreted regulator of type III secretion genes in *Pseudomonas aeruginosa*. *Proc National Acad Sci* **102**, 8006–8011 (2005).
